# Supplementary material
Source: PubMed Central journal article supplement (PMC2781581)
Supplement: supp_M109.040824_jbc.M109.040824-1.pdf [file supp_M109.040824_jbc.M109.040824-1.pdf]

a

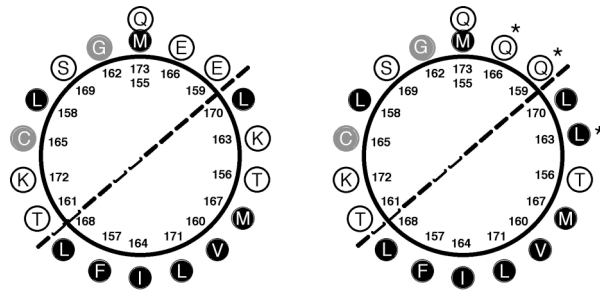

b

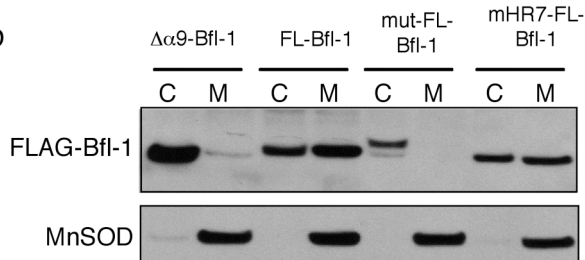

c

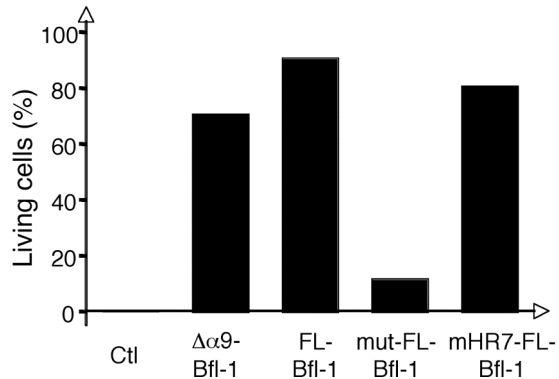

#### Supplementary Figure 1

**Supplementary material Figure 1:** Role of the amphipathic helix  $\alpha$ 9 for Bfl-1 subcellular localization and activity. (a) Helical wheel projection showing wild type-Bfl-1 $\alpha$ 9 helix (left) and Bfl-1  $\alpha$ 9 helix mutated as previously described by Ko and colleagues (right). (b) Cytosolic (C) and mitochondrial (M) protein extracts were prepared from stably transduced NIH3T3 cells with FLAG- $\Delta\alpha$ 9-Bfl-1pEGZ, FLAG-FL-Bfl-1pMIG, FLAG-mut-FL-Bfl-1pMIG or FLAG-mHR7-FL-Bfl-1pMIG. Bfl-1 proteins were assessed by western blot using anti-FLAG antibody. MnSOD is a marker of mitochondrial fractions. (c) NIH3T3 cells were stably transduced with empty vector (ctl), FLAG- $\Delta\alpha$ 9-Bfl-1pEGZ, FLAG-FL-Bfl-1pMIG, FLAG-mut-FL-Bfl-1pMIG or FLAG-mHR7-FL-Bfl-1pMIG. Apoptosis was induced by serum deprivation. Cell death was measured by PI staining and FACS analysis 72 h following serum withdrawal. Data are representative of 3 independent experiments.
